# Supplementary material
Source: MDPI journal article supplement (https://www.mdpi.com/2071-1050/15/15/11493)
Supplement: s1 [file s1 › sustainability-2470358-supplementary.pdf]

## Supplementary Information

**Title:** Admixture of Holothurian species in the Hellenic Seas (eastern Mediterranean) as revealed by RADseq

Georgios A. Gkafas, Joanne Sarantopoulou, Chrysoula Apostologamvrou, Chryssanthi Antoniadou, Athanasios Exadactylos, Georgios Fleris, Dimitris Vafidis

### Material and methods

#### *S1. AIC calculations and model comparison*

The Akaike Information Criterion (AIC) was used to evaluate the 5 demographic scenarios. The chosen model is the one that minimizes the Kullback-Leibler distance between the model and the truth. We used the formula:

$$AIC = -2 ( \ln ( \text{likelihood} ) ) + 2 K$$

, where likelihood is the probability of the data given a model and K is the number of free parameters in the model. AIC scores are shown as  $\Delta AIC$  scores (so the best model has a  $\Delta AIC$  of zero).

Akaike weights represent the relative likelihood of a model. To calculate them, for each model we first calculate the relative likelihood of the model, using the formula:

$$\exp( -0.5 * \Delta AIC ),$$

The Akaike weight for each model is this value divided by the sum of these values across all models. According to Burnham and Anderson (2002), as a rule of thumb, a  $\Delta AIC < 2$  suggests substantial evidence for the model. In this case, indeed model 2, 3 and 4 meet the criteria. Further we ascribe a probability to the models via

$$p = \exp ( -\Delta AIC / 2 ),$$

, which provides a relative probability (Burnham and Anderson, 2004).

Finally, Model averaging is then calculated by

$$\text{mod\_avg} = p \times \text{weightedAIC}.$$

The model 4 is slightly better supported than model 2 (Table S4).

However, it is still not clear which of these two is supported. For this reason we performed a F-test comparison of the two models (2 and 4) based on the sum of squares of the fastsimcoal output. Results show a better support for model 4 ( $p < 0.001$ ,  $F = 7.84$ ).

**Table S1.** Filtering steps that were carried out to generate the final high-quality SNP dataset starting from the raw SNPs output by the GATK pipeline. The number of retained SNPs after each step is reported. GQ: Genotype quality; DP: Genotype depth of coverage; IGR: Individual genotyping rate; maxDP: Depth of coverage (twice the mean depth of coverage of the raw dataset); MAF: Minimum Allele Frequency

| Filtering      | <i>H. tubulosa</i> | <i>H.poli</i> |
|----------------|--------------------|---------------|
| Raw SNPs       | 14,221,157         | 10,744,004    |
| Biallelic SNPs | 14,102,846         | 10,659,309    |
| GQ > 5         | 7,089              | 7,748         |
| DP > 5         | 7,089              | 7,748         |
| IGR > 80%      | 4,268              | 4,777         |
| maxDP          | 4,268              | 4,777         |
| MAF > 0.05     | 4,253              | 4,758         |

**Table S2.** Genetic indices of the *H.tubulosa* and *H.poli* geographical populations as calculated in Sambar (ref). Numbers in parantheses indicate number of individuals.

|                    | Population      | Private alleles | Polymorphic sites | H <sub>Obs</sub> +/- s.d. | H <sub>Exp</sub> +/- s.d. | F <sub>IS</sub> +/- s.d. |
|--------------------|-----------------|-----------------|-------------------|---------------------------|---------------------------|--------------------------|
| <i>H.poli</i>      | Toronaïos (10)  | 492             | 3,960             | 0.484 +/- 0.004           | 0.298 +/- 0.002           | - 0.046 +/- 0.018        |
|                    | Sporades (17)   | 1,107           | 3,954             | 0.497 +/- 0.004           | 0.345 +/- 0.002           | - 0.010 +/- 0.026        |
|                    | Dodekanisa (17) | 378             | 2,553             | 0.459 +/- 0.004           | 0.305 +/- 0.002           | - 0.001 +/- 0.022        |
|                    | Thermaikos (6)  | 168             | 1,387             | 0.418 +/- 0.005           | 0.238 +/- 0.003           | - 0.009 +/- 0.010        |
|                    | Cyclades (13)   | 301             | 3,633             | 0.433 +/- 0.005           | 0.274 +/- 0.002           | - 0.007 +/- 0.018        |
|                    | Ionio (4)       | 260             | 3,690             | 0.433 +/- 0.005           | 0.254 +/- 0.002           | - 0.003 +/- 0.009        |
| <i>H. tubulosa</i> | Thermaikos (7)  | 185             | 3,974             | 0.332 +/- 0.005           | 0.190 +/- 0.002           | - 0.008 +/- 0.01         |
|                    | Dodekanisa (13) | 643             | 4,022             | 0.385 +/- 0.003           | 0.272 +/- 0.002           | 0.042 +/- 0.017          |
|                    | Cyclades (14)   | 450             | 3,701             | 0.383 +/- 0.003           | 0.258 +/- 0.002           | 0.026 +/- 0.015          |
|                    | Kavala (11)     | 469             | 3,117             | 0.388 +/- 0.003           | 0.262 +/- 0.002           | 0.030 +/- 0.015          |
|                    | Pagastikos (8)  | 72              | 3,412             | 0.319 +/- 0.005           | 0.177 +/- 0.002           | 0.001 +/- 0.001          |
|                    | Toronaïos (7)   | 143             | 4,005             | 0.327 +/- 0.004           | 0.187 +/- 0.002           | - 0.007 +/- 0.009        |
|                    | Ionio (4)       | 151             | 2,401             | 0.311 +/- 0.004           | 0.181 +/- 0.002           | 0.014 +/- 0.006          |
|                    | Kalamata (9)    | 812             | 2,366             | 0.392 +/- 0.003           | 0.258 +/- 0.002           | 0.012 +/- 0.011          |
|                    | Sporades (17)   | 1,048           | 3,728             | 0.417 +/- 0.003           | 0.303 +/- 0.002           | 0.041 +/- 0.021          |

**Table S3.** Structure results of the likelihood value of the different K values and  $\Delta K$  as implementing in Evanno method.

|            | K | Reps | Mean LnP(K) | Stdev LnP(K) | Ln'(K)     | Ln''(K)   | Delta K |
|------------|---|------|-------------|--------------|------------|-----------|---------|
| H.poli     | 1 | 3    | -158579.8   | 1.513        | NA         | NA        | NA      |
|            | 2 | 3    | -157757.767 | 8.316        | 822.033    | 721.967   | 86.812  |
|            | 3 | 3    | -157657.7   | 181.721      | 100.067    | 1293      | 7.115   |
|            | 4 | 3    | -158850.633 | 1138.781     | -1192.933  | 1480.2    | 1.230   |
|            | 5 | 3    | -158563.367 | 1034.095     | 287.267    | 72034.233 | 69.659  |
|            | 6 | 3    | -230310.333 | 39250.554    | -71746.967 | NA        | NA      |
| H.tubulosa | 1 | 3    | -195194.3   | 4.557        | NA         | NA        | NA      |
|            | 2 | 3    | -194225.133 | 19.769       | 969.167    | 1892.833  | 95.749  |
|            | 3 | 3    | -195148.8   | 9.482        | -923.667   | 908.1     | 95.770  |
|            | 4 | 3    | -195164.367 | 362.441      | -15.567    | 905.733   | 2.499   |
|            | 5 | 3    | -196085.667 | 454.646      | -921.3     | 292.467   | 0.6433  |
|            | 6 | 3    | -196714.5   | 1244.874     | -628.833   | NA        | NA      |

**Table S4.** The Akaike information criterium (AIC) of each of the five tested demographic scenarios. Maximum Likelihood values are also reported for each model. Also, the weighted AIC values are reported for the close 3 scenarios regarding their original AIC values.

| Scenarios                | MaxEstLhood           | MaxObsLhood | AIC      | $\Delta AIC$ | Relative likelihood     | wAIC                    | Model probabilities | Model averaging |
|--------------------------|-----------------------|-------------|----------|--------------|-------------------------|-------------------------|---------------------|-----------------|
| Ancient gene-flow        | $7.98 \times 10^{-6}$ | -4772.87    | 164.11   | 76.06        | $3.046 \times 10^{-17}$ | $1.149 \times 10^{-17}$ |                     |                 |
| Ancient/Recent gene-flow | -4696.94              | -460        | 88.17    | 0.12         | 0.9417                  | 0.3554                  | 0.9471              | 0.3415          |
| Constant gene-flow       | -4697.51              | -4608.76    | 88.74    | 0.69         | 0.7082                  | 0.2673                  | 0.708               | 0.2123          |
| Recent gene-flow         | -4696.82              | -4608.76    | 88.05    | 0            | 1                       | 0.3774                  | 1                   | 0.3774          |
| No gene-flow             | -22379.39             | -4608.76    | 17770.63 | 17682.58     | 0                       | 0                       |                     |                 |

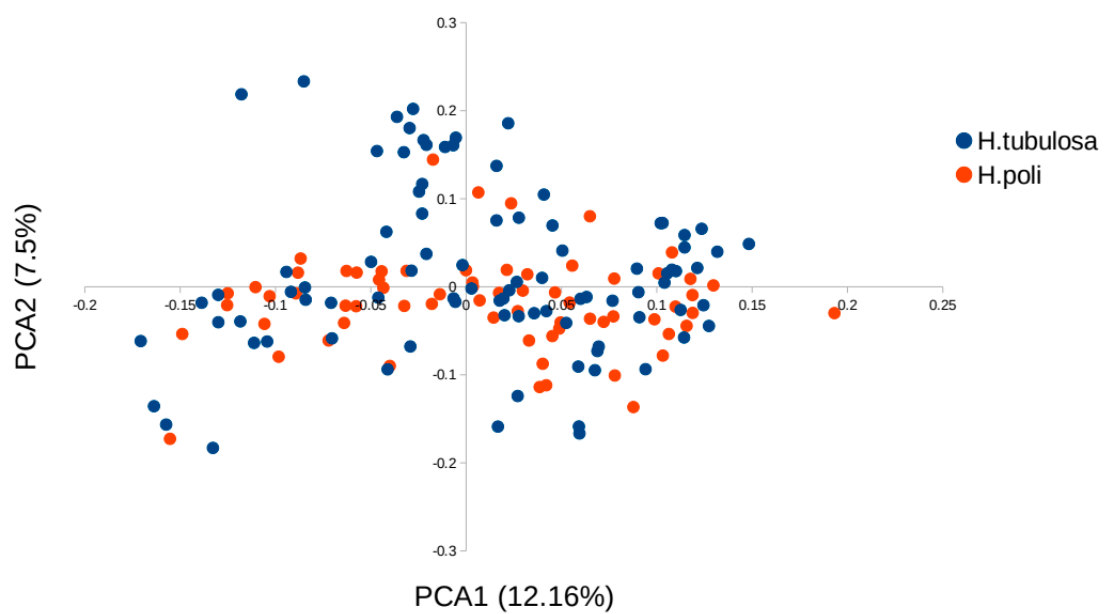

**Figure S1.** PCA analysis based on both species individuals. Blue dots: *H. tubulosa*; Red dots: *H. poli*

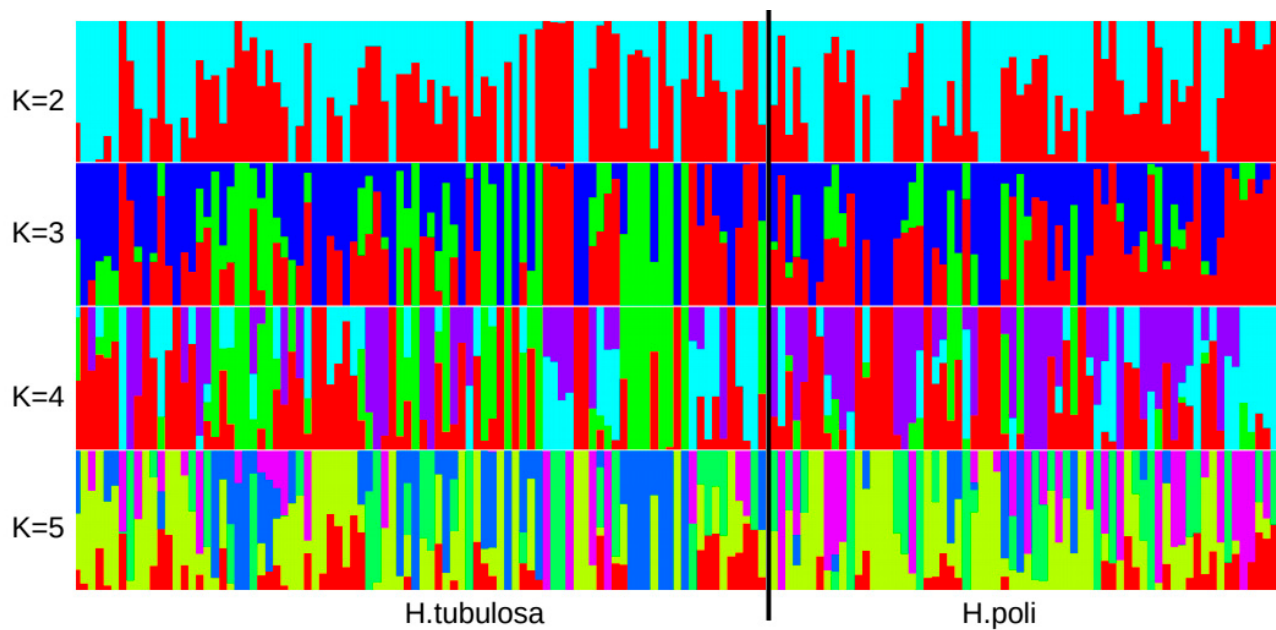

**Figure S2.** Admixture histogram of the detected clusters and assignment of the individual-level ancestry proportions from each cluster.

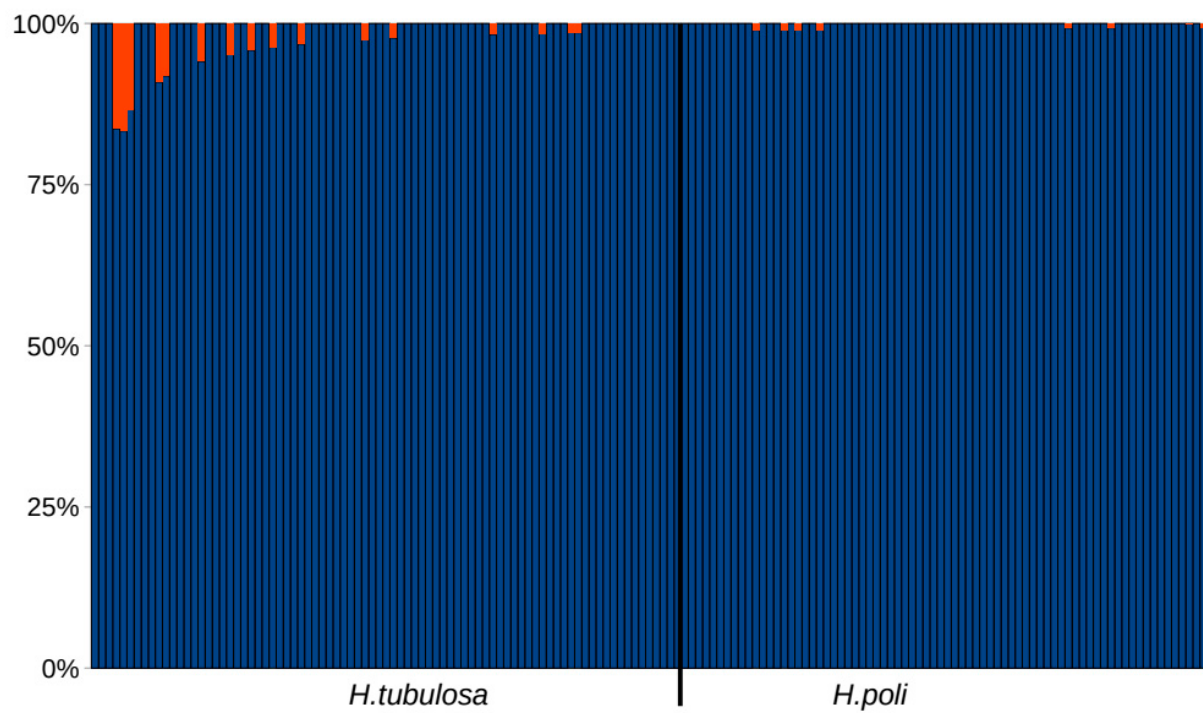

**Figure S3.** NEWHYBRIDS histogram of the posterior probabilities of the *H. tubulosa* and *H. poli* individuals. Among the 157 individuals analysis assigned them to single category (blue color).

#### References

Burnham, K. P., & Anderson, D. R. (2004). Multimodel Inference: Understanding AIC and BIC in Model Selection. *Sociological Methods & Research*, 33(2), 261–304.  
<https://doi.org/10.1177/0049124104268644>
